# Supplementary material for: FAERS based disproportionality analysis and network pharmacology investigation of conventional and liposomal formulations of doxorubicin induced cardiotoxicity
Source: Research Square preprint supplement (doi:10.21203/rs.3.rs-6849752/v1), 2025-06-17
Supplement: Supplementary file 1 [file 2166c0fa34b6d2e6f387199f.docx]

Table S1. Characteristics of reports on doxorubicin in the FAERS database.

| **Characteristics** | **Case（％）** |
| --- | --- |
| Gender |  |
| Female(%) | 15604(47.34) |
| Male(%) | 10321(31.31) |
| Not Specified(%) | 7035(21.34) |
| Age |  |
| <18(%) | 2611( 7.92) |
| 18-44(%) | 4670(14.17) |
| 45-64(%) | 8252(25.04) |
| ≥65(%) | 6720(20.39) |
| NotSpecified(%) | 10707(32.48) |
| Reporter |  |
| Consumer(%) | 1700( 5.16) |
| Lawyer(%) | 44( 0.13) |
| Not Specified(%) | 862( 2.62) |
| Other health-professional(%) | 7898(23.96) |
| Pharmacist(%) | 8768(26.60) |
| Physician(%) | 13688(41.53) |
| Continent of Reporting Origin |  |
| Europe(%) | 13043(39.57) |
| North America(%) | 12913(39.18) |
| Asia(%) | 4714(14.30) |
| Not Specified(%) | 965( 2.93) |
| Oceania(%) | 716( 2.17) |
| Africa(%) | 317( 0.96) |
| Reported countries |  |
| United States of America(%) | 10369(31.46) |
| France(%) | 2589( 7.85) |
| Canada(%) | 2409( 7.31) |
| Italy(%) | 2248( 6.82) |
| Japan(%) | 1845( 5.60) |
