# Supplementary figures and images for: FAERS based disproportionality analysis and network pharmacology investigation of conventional and liposomal formulations of doxorubicin induced cardiotoxicity
Source: Research Square preprint supplement (doi:10.21203/rs.3.rs-6849752/v1), 2025-06-17

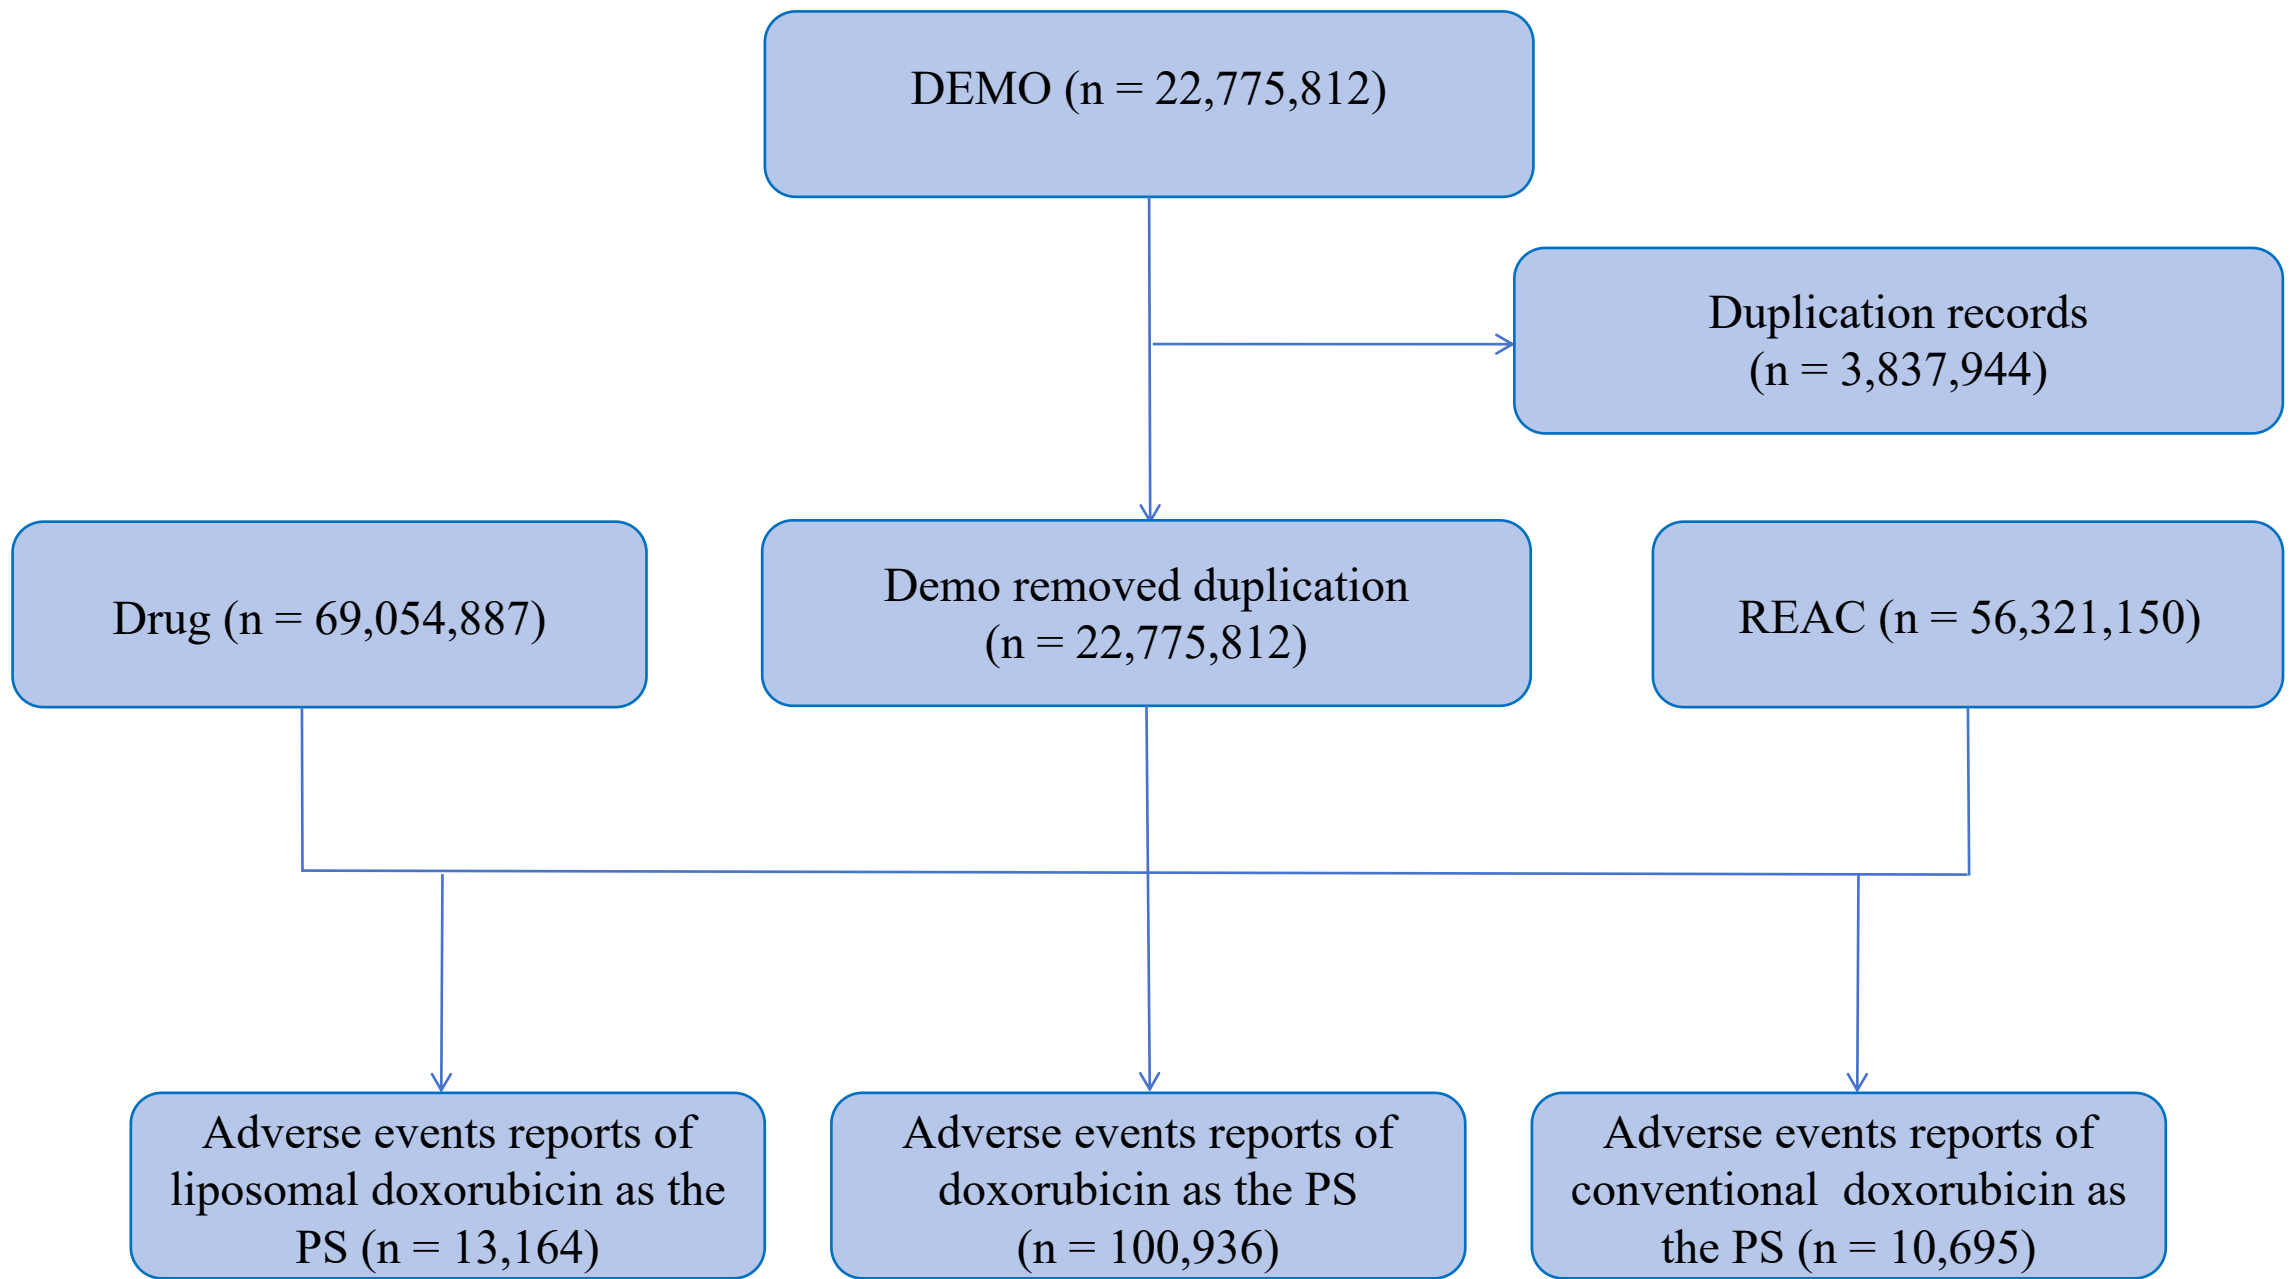

Figure S1. Flow chart of data extraction in FAERS database

Supplement: Supplementary file 1 [file 4043e56ed87eb1c510e0ee1a.pdf]
